# Supplementary material for: Live‐cell RESOLFT nanoscopy of transgenic Arabidopsis thaliana
Source: PubMed Central journal article supplement (PMC7507094; doi:10.1002/pld3.261), 2020-09-03

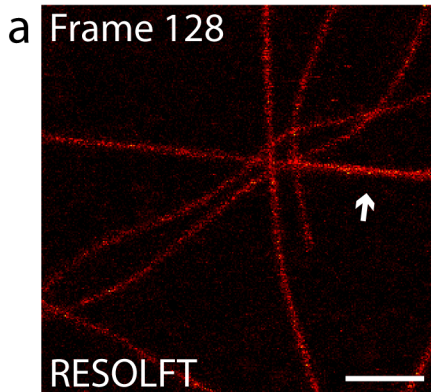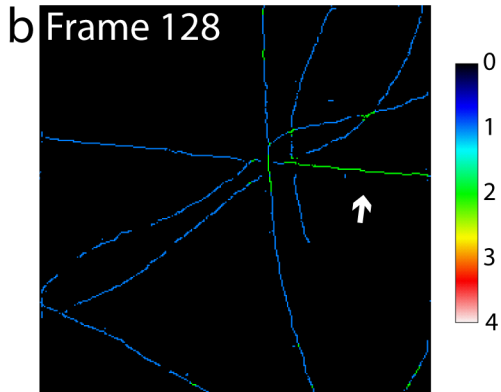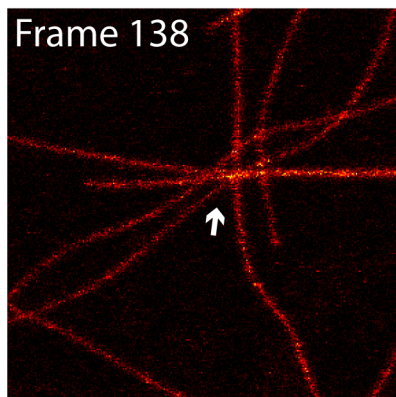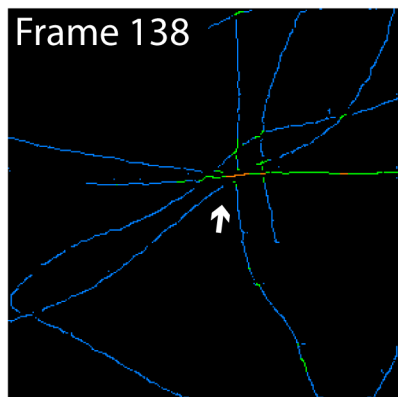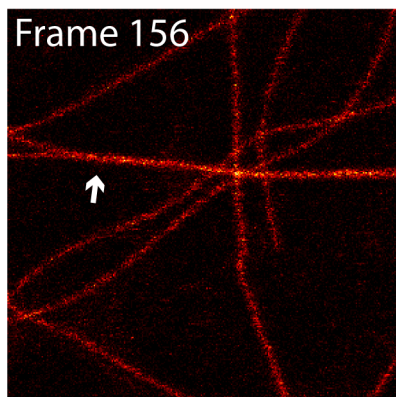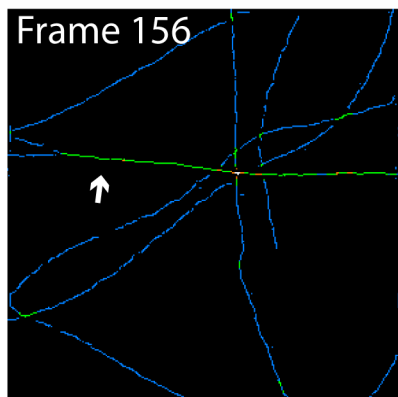

Supplement: PLD3-4-e00261-s004.pdf [file PLD3-4-e00261-s004.pdf]
