# Supplementary material for: Live‐cell RESOLFT nanoscopy of transgenic Arabidopsis thaliana
Source: PubMed Central journal article supplement (PMC7507094; doi:10.1002/pld3.261), 2020-09-03
Supplement: PLD3-4-e00261-s005.pdf [file PLD3-4-e00261-s005.pdf]

| RESOLFT-image   | 405 nm on switching |                              | 488 nm off switching beam |                              | 488 nm readout   |                              | Pixel size xy [nm] | Line accumulation |
|-----------------|---------------------|------------------------------|---------------------------|------------------------------|------------------|------------------------------|--------------------|-------------------|
|                 | Power [ $\mu$ W]    | Illumination time [ $\mu$ s] | Power [ $\mu$ W]          | Illumination time [ $\mu$ s] | Power [ $\mu$ W] | Illumination time [ $\mu$ s] |                    |                   |
| Fig. 2a         | 3.3                 | 20                           | 8.3                       | 480                          | 18               | 30                           | 22                 | 1                 |
| Fig. 3a         | 3                   | 12                           | 6                         | 120                          | 11               | 30                           | 30                 | 1                 |
| Fig. 4d         | 3.7                 | 20                           | 40                        | 280                          | 1                | 100                          | 30                 | 4                 |
| Suppl. Fig. S2a | 2.4                 | 20                           | 25                        | 480                          | 9.4              | 40                           | 30                 | 3                 |
| Suppl. Fig. S2b | 2.3                 | 20                           | 21                        | 500                          | 9.5              | 40                           | 30                 | 3                 |
| Suppl. Fig. S2c | 2.3                 | 20                           | 20                        | 540                          | 9                | 40                           | 25                 | 2                 |
| Suppl. Fig. S2d | 2.5                 | 20                           | 35                        | 480                          | 8                | 40                           | 25                 | 2                 |
| Suppl. Fig. S3a | 3.7                 | 20                           | 25                        | 340                          | 23               | 30                           | 40                 | 1                 |
| Suppl. Fig. S4a | 3.5                 | 12                           | 21                        | 190                          | 16               | 40                           | 35                 | 1                 |
| Suppl. Movie S1 | 11                  | 10                           | 36                        | 150                          | 12               | 30                           | 40                 | 1                 |
| Suppl. Movie S2 | 3.7                 | 20                           | 25                        | 340                          | 23               | 30                           | 40                 | 1                 |
| Suppl. Movie S3 | 3.5                 | 12                           | 21                        | 190                          | 16               | 40                           | 35                 | 1                 |
